# Supplementary material for: Cannabinoid exposure as a major driver of pediatric acute lymphoid Leukaemia rates across the USA: combined geospatial, multiple imputation and causal inference study
Source: Springer Nature journal article supplement (doi:10.1186/s12885-021-08598-7), 2021-09-03
Supplement: MOESM1 [file 12885_2021_8598_MOESM1_ESM-1.pdf]

# *ST1 - Kriged ALL Data*

| State          | Year |      |      |      |      |      |      |      |      |      |      |      |      |      |      |      |      |       |
|----------------|------|------|------|------|------|------|------|------|------|------|------|------|------|------|------|------|------|-------|
|                | 2001 | 2002 | 2003 | 2004 | 2005 | 2006 | 2007 | 2008 | 2009 | 2010 | 2011 | 2012 | 2013 | 2014 | 2015 | 2016 | 2017 | Total |
| Alabama        | 1.6  | 1.7  | 1.3  | 2    | 1.2  | 1.5  | 1.6  | 2    | 1.6  | 1.6  | 1.7  | 2.2  | 1.7  | 2    | 2    | 2.5  | 1.9  | 1.8   |
| Arkansas       | 2.2  | 1.6  | 2.3  | 1.4  | 1.5  | 1.3  | 1.7  | 1.8  | 2.3  | 1.7  | 1.8  | 1.9  | 2.1  | 1.9  | 2.2  | 2.5  | 1.8  | 1.9   |
| Arizona        | 3    | 2.8  | 2.3  | 2.2  | 2.4  | 2.5  | 2.3  | 2.5  | 3    | 2.5  | 2.4  | 2.3  | 2    | 2.3  | 3.4  | 2.6  | 2    | 2.5   |
| California     | 2.5  | 2.5  | 2.4  | 2.7  | 2.5  | 2.8  | 2.8  | 2.9  | 2.9  | 2.9  | 2.7  | 2.7  | 2.7  | 3    | 3    | 3    | 2.7  | 2.8   |
| Colorado       | 2.7  | 1.9  | 2.5  | 2    | 1.9  | 2.2  | 2.6  | 2.5  | 2.9  | 1.7  | 2.8  | 2    | 2.2  | 1.9  | 2.1  | 2.4  | 2    | 2.3   |
| Connecticut    | 1.8  | 2.4  | 2.1  | 2.7  | 2.9  | 2.2  | 2.6  | 2.4  | 2.8  | 2.4  | 2    | 2    | 1.6  | 1.7  | 1.5  | 1.5  | 2.6  | 2.2   |
| Florida        | 2.5  | 2.2  | 2.2  | 2    | 2.1  | 2.1  | 2.6  | 2.8  | 2.1  | 2.5  | 2.2  | 2.5  | 2.4  | 2.3  | 2.6  | 2.4  | 2.5  | 2.4   |
| Georgia        | 2.1  | 1.9  | 1.9  | 1.6  | 1.8  | 2    | 2    | 1.5  | 2.2  | 1.9  | 2.2  | 1.7  | 1.5  | 1.7  | 1.7  | 2    | 2.1  | 1.9   |
| Idaho          | 2.2  | 2.2  | 2.2  | 2.2  | 2.2  | 2.8  | 2.5  | 2.2  | 2.2  | 2.6  | 2.9  | 2.2  | 2.4  | 2.1  | 3    | 2.3  | 1.9  | 2.2   |
| Illinois       | 2.1  | 1.9  | 2.2  | 2.4  | 2.2  | 2.5  | 2.1  | 2.4  | 2.1  | 2.2  | 2.2  | 2.2  | 2.3  | 2    | 2.2  | 2.4  | 2.3  | 2.2   |
| Indiana        | 2.1  | 1.5  | 1.7  | 2.1  | 2.3  | 1.9  | 2.2  | 2.5  | 1.9  | 2.4  | 2.2  | 2.6  | 1.8  | 1.6  | 2.5  | 2.3  | 1.4  | 2.1   |
| Iowa           | 1.9  | 2.4  | 1.7  | 2    | 1.9  | 1.6  | 2.2  | 1.6  | 2.7  | 2    | 2.3  | 1.9  | 2.3  | 1.9  | 2.6  | 3.2  | 2.2  | 2.1   |
| Louisiana      | 1.8  | 1.7  | 1.4  | 1.6  | 1.7  | 1.4  | 2.4  | 1.7  | 1.6  | 1.6  | 2.2  | 1.5  | 1.7  | 1.6  | 2.3  | 1.4  | 1.6  | 1.7   |
| Maryland       | 1.3  | 1.6  | 1.5  | 1.5  | 1.3  | 1.2  | 1.6  | 1.9  | 1.9  | 1.6  | 1.7  | 1.6  | 1.7  | 1.5  | 1.7  | 2.1  | 1.8  | 1.6   |
| Michigan       | 2.1  | 2.3  | 1.8  | 1.8  | 2.1  | 2.1  | 1.7  | 2.1  | 2.1  | 2.3  | 2.4  | 2    | 2.1  | 2.1  | 1.8  | 1.9  | 1.7  | 2     |
| Minnesota      | 2.5  | 1.6  | 2.2  | 2.7  | 2.1  | 2    | 2    | 2.3  | 2    | 2.2  | 2.4  | 2.5  | 2.5  | 1.6  | 2.4  | 1.7  | 2.5  | 2.2   |
| Missouri       | 2.1  | 1.4  | 2.4  | 1.6  | 2.2  | 1.8  | 1.8  | 1.7  | 2.2  | 2    | 1.9  | 1.8  | 1.7  | 1.9  | 1.9  | 2.2  | 1.4  | 1.9   |
| Mississippi    | 1.8  | 1.8  | 1.7  | 1.1  | 2    | 1.7  | 2.1  | 2.1  | 1.4  | 1.3  | 1.6  | 1.9  | 1.9  | 1.9  | 2.1  | 1.8  | 1.7  | 1.8   |
| North Carolina | 2.1  | 1.3  | 1.8  | 1.7  | 2    | 1.9  | 1.9  | 2    | 2.3  | 2.4  | 2    | 2.2  | 1.9  | 2.1  | 2.2  | 2    | 1.7  | 2     |
| Nebraska       | 1.9  | 2.6  | 3.3  | 2.1  | 2.05 | 2    | 1.93 | 1.87 | 1.8  | 2.6  | 2.7  | 2.5  | 2.5  | 2.5  | 2    | 2.3  | 2.7  | 2.1   |
| New Jersey     | 2.2  | 2.1  | 2.2  | 2.4  | 2.5  | 2.5  | 2.7  | 1.8  | 2.5  | 2.4  | 2.2  | 2.2  | 2    | 2.6  | 2.2  | 2.8  | 2.5  | 2.3   |
| New Mexico     | 3.7  | 3.5  | 2.3  | 3.6  | 2.8  | 2.9  | 2.1  | 2.2  | 2.2  | 2.2  | 2.7  | 2.1  | 3    | 2.5  | 3    | 3    | 2.3  | 2.7   |
| Nevada         | 2.8  | 1.5  | 1.6  | 2.8  | 2.1  | 2.3  | 2    | 2    | 2.7  | 3.1  | 3.1  | 1.2  | 2.3  | 2.4  | 2.3  | 3.3  | 2.2  | 2.3   |
| New York       | 1.9  | 2.2  | 2    | 2.3  | 2.1  | 2.1  | 2.2  | 2.4  | 2.3  | 2.4  | 2.4  | 2.4  | 2.1  | 2.4  | 2.3  | 1.8  | 2    | 2.2   |
| Ohio           | 1.6  | 1.9  | 2    | 2.3  | 1.8  | 2    | 1.8  | 1.9  | 1.9  | 2.1  | 2.3  | 1.7  | 2    | 2    | 2.1  | 2.3  | 1.7  | 2     |
| Oklahoma       | 2.3  | 1.9  | 2.2  | 1.8  | 2    | 2.5  | 2.1  | 2.1  | 2    | 1.9  | 2.1  | 2.3  | 2    | 1.2  | 2.4  | 2.2  | 1.6  | 2     |
| Oregon         | 2.8  | 2.4  | 1.7  | 2.1  | 2.1  | 2.8  | 3.2  | 2.6  | 2.3  | 1.9  | 2    | 2.9  | 2    | 2.4  | 3.3  | 2    | 2.6  | 2.4   |
| South Carolina | 1.5  | 2.4  | 1    | 2.4  | 1    | 1.5  | 2.3  | 1.6  | 1.7  | 2.1  | 2.3  | 1.9  | 1.7  | 1.6  | 1.9  | 1.8  | 1.9  | 1.8   |
| Tennessee      | 1.8  | 1.5  | 1.7  | 2.7  | 2.1  | 2.1  | 2.1  | 2.1  | 1.9  | 1.9  | 2.4  | 2.3  | 2    | 2    | 2.2  | 1.7  | 2.4  | 2     |
| Texas          | 2.5  | 2.3  | 2.2  | 2.4  | 2.3  | 2.5  | 2.5  | 2.6  | 2.7  | 2.5  | 2.5  | 2.5  | 2.5  | 2.4  | 2.6  | 2.6  | 2.6  | 2.5   |
| Utah           | 1.2  | 2.2  | 2.1  | 2.1  | 2.7  | 1.7  | 2    | 2.6  | 1.4  | 1.8  | 2.7  | 2.4  | 2.7  | 1.9  | 2.1  | 2.3  | 2.7  | 2.2   |
| Virginia       | 1.3  | 1.8  | 1.8  | 1.9  | 1.9  | 2.1  | 2    | 2.4  | 1.6  | 2    | 2.1  | 1.6  | 1.3  | 1.8  | 2.1  | 1.8  | 1.6  | 1.8   |
| Washington     | 2    | 2.1  | 1.8  | 2.5  | 2.1  | 2.4  | 2.6  | 2    | 2.3  | 1.9  | 2.1  | 2.4  | 2.6  | 2.7  | 1.8  | 2.2  | 2.1  | 2.2   |
| Wisconsin      | 1.7  | 2.3  | 2.2  | 1.8  | 2.3  | 2.6  | 2.1  | 2.6  | 2.4  | 2.5  | 2    | 2.4  | 2.1  | 1.9  | 1.8  | 1.9  | 1.1  | 2.1   |
